# Supplementary material
Source: PubMed Central journal article supplement (PMC2446667)

**Supplemental Table 1.** Primers used for RT-PCR and ChIP PCR analysis.

| Gene ID     | Target position | Forward primer (5'→3')                    | Reverse Primer (5'→3')                     |
|-------------|-----------------|-------------------------------------------|--------------------------------------------|
| PFC0060c    | ORF<br>Promoter | GCATTTAGGTAAGATATC<br>CAATTTGTAAGACCTGTAA | CCCATCATACTCAGTCA<br>GTTATATAACATATATGTG   |
| MAL6P1.267  | ORF<br>promoter | CGTACATATATTGCATGT<br>CTCGAAACGACGGATATC  | CCCTTTTGATGATTAGTT<br>CCGGCATGAAGTGAAAG    |
| PF07_0019   | ORF<br>promoter | CAAACAGCGTGGGGAG<br>CTTGTAATACACCTTGAT    | CTCATTAATCTCATATTC<br>ACATTTTAATCTTCAAAAG  |
| MAL8P1.134  | ORF<br>promoter | CCTACATGTACTCCTTGT<br>GTGCATTAATCATATGGTC | CTGAATTGATCCGTTTTG<br>GTTAATGTACCCTTTTTGT  |
| PF11685w    | ORF<br>promoter | GAATTCGTAATTGGTG<br>GTGGTGTA AATTAGGAGA   | GGAATTATGAATGAATAT<br>ACACGTAGCTTTTTTATG   |
| PF11_0362   | ORF<br>Promoter | TCTGGAAGGCATAACATA<br>TGATATGTCAAATCCTTC  | CATCTATTTGTATGACATAC<br>CCTGCATGACCATCAATC |
| PF11_0510   | ORF<br>promoter | CAACAACGTTAAGACATG<br>GTGTTAGTTTCAGTTGAAT | CCTTCTTTCTTCAATATC<br>CTCTAGCAATTTAAAAAGC  |
| PF13_0211   | ORF<br>promoter | CCATATTTTGATAGATCC<br>GAATTTGTAGTGCATCCT  | GATGATCCATCTGTTTCA<br>TTCTCAAACGATAGGTAG   |
| PF14_0346   | ORF<br>promoter | GTACATTTAGAGCTACCC<br>CCTATAATATTACAGCCA  | CAGTATATATTAACGATG<br>CCTTTTTTTTCTTCAAAG   |
| PF14_0408   | ORF<br>prompter | GGCATATTCAATGAAAG<br>GAAGTGTGCGCAAACA     | GCTAGTATTGCTATTAAG<br>CTTGAGATATACATGTAT   |
| PF14_0602   | ORF<br>promoter | GAGAACTACCTCACGTT<br>ATGTGTAGCCATATGTGT   | CCATTACCTCAACCACC<br>CGTTTAAAGTTTGATCAC    |
| PF08_0054   | ORF<br>promoter | CAATTACCAACGACAAAG<br>CTCGTTTATAACAAATTG  | TGAGCTTTTAACTCCATA<br>ATAAGA ACTATGGTATTTA |
| PF08_0131   | ORF<br>promoter | TAGATAAGTGGGATATTC<br>CATATATATATCATATG   | GGATTTAAGA ACTCTAAG<br>GAATTCTACATACACTAC  |
| PF14_0081   | ORF<br>promoter | CGATATTAGGTTCTCGA<br>GAGAATTATTTGCACATG   | GTTTCTACATCCATAGGA<br>CATATATGACATTGAAGA   |
| PF13_0222   | ORF<br>promoter | CGGCATTGTATATCC<br>GTATAGCTTATTTAAC       | GAATCATCATTATGATGA<br>ACAATGGAAATTTTAC     |
| MAL13P1.134 | ORF<br>promoter | GATGATGAAGTTCGTAGTG<br>CATTCCTTTCCTGAAATG | GCATACATAAGTAAATAC<br>GATATAAACACATCAATC   |
| PF14_0563   | ORF<br>promoter | CAGCTTCTGACCTTTTGT<br>GTGCGTATATTGATAGG   | GCTTAGTATCACTTTCAC<br>CAAACTGCTTAAAAGA     |

**Supplemental Table 2.** Down- and up-regulated genes in *P. falciparum* after treatment with anacardic acid ( $\geq 2$  fold changes at 20  $\mu\text{M}$ )

**Down-regulated genes**

| Gene ID*                   | Functional Description                      | Fold change ( $\pm$ STD) |                  |                 |
|----------------------------|---------------------------------------------|--------------------------|------------------|-----------------|
|                            |                                             | 20 $\mu\text{M}$         | 10 $\mu\text{M}$ | 5 $\mu\text{M}$ |
| <b>Binding</b>             |                                             |                          |                  |                 |
| PFB0640c                   | WD40 repeats-containing                     | 2.0 $\pm$ 0.1            | 1.4 $\pm$ 0.2    | 1.8 $\pm$ 0.4   |
| PFB0935w (GCN5/H3K9ac)     | CLAG2                                       | 2.5 $\pm$ 0.2            | 2.0 $\pm$ 0.4    | 2.5 $\pm$ 0.1   |
| PFC0010c                   | Rifin                                       | 2.5 $\pm$ 0.2            | 2.3 $\pm$ 0.5    | 1.7 $\pm$ 0.5   |
| PFC0110w (GCN5/H3K9ac)     | CLAG                                        | 2.7 $\pm$ 0.2            | 1.7 $\pm$ 0.4    | 1.5 $\pm$ 0.3   |
| PFC0160w (H3K9ac)          | binding protein, putative                   | 2.1 $\pm$ 0.3            | 1.7 $\pm$ 0.4    | 1.9 $\pm$ 0.2   |
| PFC0800w                   | Band 7-related protein                      | 2.1 $\pm$ 0.4            | 1.4 $\pm$ 0.5    | 1.4 $\pm$ 0.4   |
| PFD0030c                   | Rifin                                       | 2.3 $\pm$ 0.2            | 1.7 $\pm$ 0.1    | 1.4 $\pm$ 0.4   |
| PFD0135w (GCN5/H3K9ac)     | VAR pseudogene                              | 2.2 $\pm$ 0.3            | 2.2 $\pm$ 0.4    | 2.7 $\pm$ 0.2   |
| PFD1015c                   | PfEMP1                                      | 2.2 $\pm$ 0.2            | 1.3 $\pm$ 0.3    | 1.3 $\pm$ 0.4   |
| PFD1120c (GCN5/H3K9ac)     | ETRAMP-like                                 | 2.6 $\pm$ 0.1            | 2.1 $\pm$ 0.2    | 2.1 $\pm$ 0.3   |
| PFE0400w                   | ankyrin repeats-containing                  | 2.2 $\pm$ 0.6            | 1.4 $\pm$ 0.2    | 1.8 $\pm$ 0.1   |
| PFE1640w                   | PfEMP1                                      | 3.0 $\pm$ 0.3            | 2.0 $\pm$ 0.2    | 2.1 $\pm$ 0.3   |
| MAL6P1.315                 | Rifin                                       | 2.1 $\pm$ 0.3            | 1.8 $\pm$ 0.3    | 1.4 $\pm$ 0.5   |
| PF07_0101 (GCN5)           | Erythrocyte membrane-associated protein 332 | 2.1 $\pm$ 0.1            |                  |                 |
| PFI0265c                   | rhopty protein                              | 2.3 $\pm$ 0.2            | 1.8 $\pm$ 0.1    | 2.4 $\pm$ 0.3   |
| PFI1730w                   | CLAG                                        | 2.2 $\pm$ 0.1            | 1.8 $\pm$ 0.1    | 2.0 $\pm$ 0.2   |
| PFI1830c                   | PfEMP1                                      | 2.6 $\pm$ 0.5            | 2.2 $\pm$ 0.2    | 2.3 $\pm$ 0.2   |
| PF10_0355                  | PfEMP1-like                                 | 2.5 $\pm$ 0.1            |                  |                 |
| PF11_0213                  | Rifin                                       | 2.3 $\pm$ 0.3            | 1.5 $\pm$ 0.2    | 1.7 $\pm$ 0.5   |
| PF11_0486                  | MAEBL                                       | 2.5 $\pm$ 0.1            | 1.2 $\pm$ 0.2    | 1.3 $\pm$ 0.1   |
| PF11_0512                  | RESA2                                       | 2.9 $\pm$ 0.5            | 2.7 $\pm$ 0.2    | 2.4 $\pm$ 0.2   |
| PFL0940c (GCN5/H3K9ac)     | VAR fragment, pseudogene                    | 2.2 $\pm$ 0.2            | 1.1 $\pm$ 0.4    | 1.0 $\pm$ 0.4   |
| PFL1955w                   | PfEMP1                                      | 2.3 $\pm$ 0.3            | 1.4 $\pm$ 0.4    | 1.7 $\pm$ 0.4   |
| PF13_0001                  | PfEMP1                                      | 2.2 $\pm$ 0.3            | 1.3 $\pm$ 0.3    | 1.3 $\pm$ 0.4   |
| PF14_0001                  | PfEMP1                                      | 2.8 $\pm$ 0.2            | 1.4 $\pm$ 0.3    | 1.3 $\pm$ 0.3   |
| PF14_0513                  | RNA binding protein                         | 2.7 $\pm$ 0.2            | 1.3 $\pm$ 0.2    |                 |
| <b>Catalytic/metabolic</b> |                                             |                          |                  |                 |
| PFA0485w (H3K9ac)          | Cytidylyltransferase family                 | 2.0 $\pm$ 0.4            | 1.7 $\pm$ 0.4    | 1.7 $\pm$ 0.3   |
| PFB0325c                   | cysteine protease (SERA)                    | 2.5 $\pm$ 0.4            | 2.8 $\pm$ 0.3    | 2.0 $\pm$ 0.2   |
| PFB0335c                   | cysteine protease (SERA)                    | 2.1 $\pm$ 0.3            | 1.6 $\pm$ 0.3    | 2.0 $\pm$ 0.3   |
| PFB0355c                   | cysteine protease (SERA)                    | 2.3 $\pm$ 0.2            | 1.9 $\pm$ 0.3    | 1.9 $\pm$ 0.2   |
| PFB0360c                   | cysteine protease (SERA)                    | 2.1 $\pm$ 0.4            | 1.4 $\pm$ 0.4    | 2.0 $\pm$ 0.3   |
| PFD0085c                   | ATP-dependent Ac-CoA synthetase             | 2.1 $\pm$ 0.1            | 0.8 $\pm$ 0.3    | 0.8 $\pm$ 0.1   |
| PFD0780w                   | glutamyl-tRNA amidotransferase subunit A    | 2.1 $\pm$ 0.4            | 2.1 $\pm$ 0.5    | 1.3 $\pm$ 0.5   |
| PFE0835w                   | ubiquitin carboxyl-terminal hydrolase 2     | 2.3 $\pm$ 0.3            | 1.6 $\pm$ 0.1    | 2.1 $\pm$ 0.3   |
| MAL6P1.278                 | endonuclease iii homologue                  | 2.1 $\pm$ 0.1            | 1.6 $\pm$ 0.1    | 1.9 $\pm$ 0.3   |
| MAL7P1.130                 | Methyltransferase domain                    | 2.0 $\pm$ 0.2            | 1.7 $\pm$ 0.2    | 1.5 $\pm$ 0.4   |
| MAL7P1.29 (GCN5/H3K9ac)    | Alpha/beta hydrolase of unknown function    | 2.1 $\pm$ 0.3            | 1.8 $\pm$ 0.1    | 2.0 $\pm$ 0.4   |

|                                         |                                               |         |         |         |
|-----------------------------------------|-----------------------------------------------|---------|---------|---------|
| MAL8P1.22                               | dehydrodolichyl diphosphate synthetase        | 2.2±0.2 | 1.7±0.3 | 1.5±0.3 |
| <a href="#">PF08_0011 (GCN5/H3K9ac)</a> | leucine - tRNA ligase                         | 2.1±0.4 | 1.6±0.4 | 1.8±0.3 |
| <a href="#">PF08_0066 (GCN5/H3K9ac)</a> | lipoamide dehydrogenase                       | 2.1±0.4 | 1.5±0.5 | 1.7±0.2 |
| <a href="#">PFI1180w (H3K9ac)</a>       | Patatin-like phospholipase                    | 2.1±0.2 | 1.5±0.1 | 1.2±0.2 |
| PF10_0058                               | Peptidase family M3                           | 2.1±0.4 | 1.8±0.4 | 1.8±0.2 |
| PF11_0203                               | Peptidase family M41                          | 2.0±0.5 | 1.7±0.4 | 1.5±0.5 |
| PF11_0412                               | Vacuolar ATP synthase subunit F               | 2.2±0.1 | 1.8±0.3 | 1.8±0.2 |
| <a href="#">PFL0180w (GCN5/H3K9ac)</a>  | cytochrome c1 heme lyase                      | 2.4±0.4 | 2.2±0.4 |         |
| <a href="#">MAL13P1.298</a>             | Alpha/beta hydrolase of unknown function      | 2.9±0.5 | 2.0±0.4 | 2.3±0.1 |
| PF13_0066                               | malonyl coa-acyl carrier protein transacylase | 2.4±0.1 | 1.6±0.6 | 1.8±0.5 |
| <a href="#">PF13_0336</a>               | Endonuclease/Exonuclease/phosphatase family   | 2.2±0.5 | 1.4±0.6 | 1.7±0.2 |
| PF14_0615                               | ATP synthase (C/AC39) subunit                 | 2.4±0.2 | 1.9±0.0 | 2.2±0.4 |
| <a href="#">PF14_0751</a>               | fatty acyl coA synthetase-1                   | 2.1±0.1 | 1.7±0.3 | 1.2±0.2 |

### Chaperone

|                          |                                          |         |         |         |
|--------------------------|------------------------------------------|---------|---------|---------|
| PFA0660w                 | DnaJ domain-containing                   | 2.0±0.4 | 1.3±0.1 | 1.4±0.1 |
| <a href="#">PFE0505w</a> | cyclophilin                              | 2.3±0.4 | 2.1±0.3 | 2.1±0.3 |
| PFE1170w                 | DnaJ molecular chaperone homology domain | 2.3±0.3 | 1.6±0.5 | 1.1±0.5 |
| PF08_0032                | DnaJ molecular chaperone homology domain | 2.2±0.1 | 1.5±0.1 | 1.1±0.2 |
| PFI0355c                 | ATP-dependent heat shock protein         | 3.1±0.1 | 2.8±0.5 | 2.7±0.4 |

### DNA replication/repair

|                                         |                              |         |         |         |
|-----------------------------------------|------------------------------|---------|---------|---------|
| <a href="#">PFC0765c</a>                | PSF2 domain containing       | 2.1±0.2 | 1.5±0.4 | 1.5±0.5 |
| PF08_0126                               | DNA repair protein rad54     | 2.3±0.4 | 1.5±0.1 | 1.7±0.0 |
| <a href="#">PF13_0102</a>               | DNAJ-like Sec63 homologue    | 2.1±0.1 | 1.2±0.2 | 1.9±0.5 |
| <a href="#">PF14_0602 (GCN5/H3K9ac)</a> | DNA polymerase alpha subunit | 2.1±0.3 | 1.6±0.3 | 1.3±0.4 |

### Motor activity

|                                         |                                         |         |         |         |
|-----------------------------------------|-----------------------------------------|---------|---------|---------|
| PFC0770c                                | kinesin-related protein                 | 2.0±0.4 | 1.5±0.3 | 1.6±0.2 |
| <a href="#">PF10_0251 (GCN5/H3K9ac)</a> | dynein heavy chain, N-terminal region 2 | 2.5±0.3 | 1.6±0.2 | 1.4±0.4 |
| <a href="#">PF11_0148</a>               | dynein light chain type 2               | 2.0±0.2 | 1.3±0.5 | 0.9±0.2 |
| PF11_0416                               | myosin heavy chain subunit              | 2.1±0.5 | 1.9±0.5 | 2.0±0.5 |
| PF14_0202                               | dynein-associated protein               | 2.1±0.2 | 1.3±0.1 | 1.0±0.2 |

### Signal transduction

|                                         |                                                  |         |         |         |
|-----------------------------------------|--------------------------------------------------|---------|---------|---------|
| PFC0060c                                | Ser/Thr protein kinase                           | 3.9±0.3 | 3.5±0.5 | 3.0±0.5 |
| MAL6P1.267                              | Ser/Thr phosphatases                             | 2.9±0.5 | 2.9±0.5 | 2.7±0.3 |
| MAL6P1.41                               | Protein kinase C conserved region 2              | 2.3±0.3 | 2.1±0.5 | 1.5±0.2 |
| PF07_0019                               | Ser/Thr phosphatases, family 2C                  | 2.1±0.5 | 2.0±0.3 | 1.6±0.3 |
| MAL8P1.134                              | Protein kinase C conserved region 2              | 2.5±0.3 | 2.0±0.3 | 2.6±0.1 |
| PFI1685w                                | cAMP-dependent protein kinase catalytic subunit  | 2.0±0.1 | 1.7±0.1 | 1.8±0.2 |
| PFL1110c                                | cAMP-dependent protein kinase regulatory subunit | 2.2±0.2 | 1.7±0.2 | 2.2±0.2 |
| PF11_0362                               | Sigma factor PP2C-like phosphatases              | 2.6±0.4 | 1.8±0.1 | 2.1±0.3 |
| <a href="#">PF11_0510 (GCN5/H3K9ac)</a> | Ser/Thr protein kinase                           | 3.2±0.2 | 2.8±0.0 | 2.5±0.0 |
| PF13_0211                               | calcium-dependent protein kinase                 | 2.3±0.4 | 1.8±0.2 | 1.4±0.4 |
| PF14_0346                               | cGMP-dependent protein kinase 1, beta isozyme    | 2.4±0.2 | 1.9±0.1 | 2.3±0.3 |
| PF14_0408                               | Ser/Thr protein kinase                           | 2.2±0.6 | 1.7±0.2 |         |

| <b>Structural</b>                         |                                                    |         |         |         |
|-------------------------------------------|----------------------------------------------------|---------|---------|---------|
| PFD0490c                                  | actin-like protein                                 | 2.7±0.1 | 2.2±0.1 | 2.1±0.1 |
| PFE0255w                                  | actin-related protein                              | 2.3±0.2 | 1.8±0.0 |         |
| <a href="#">PF07_0054 (GCN5/H3K9ac)</a>   | histone h2b variant                                | 2.3±0.1 | 2.1±0.5 | 2.3±0.5 |
| PFI1635w                                  | delta tubulin                                      | 2.3±0.3 | 1.4±0.1 | 1.5±0.0 |
| <b>Transcription/translation</b>          |                                                    |         |         |         |
| <a href="#">MAL6P1.183</a>                | iswi protein homologue                             | 2.2±0.2 | 1.1±0.5 | 1.6±0.3 |
| MAL6P1.49                                 | DNA helicase                                       | 2.3±0.2 | 1.6±0.2 | 1.6±0.2 |
| MAL7P1.81                                 | eukaryotic translation initiation factor 3         | 7.5±0.5 | 9.0±0.2 | 8.7±0.3 |
| MAL7P1.86                                 | Transcription initiation factor iie, alpha subunit | 2.0±0.4 | 1.8±0.2 | 1.7±0.2 |
| <a href="#">PF10_0309</a>                 | DEAD-like helicase superfamily                     | 2.0±0.1 | 1.4±0.5 | 1.7±0.3 |
| <a href="#">PF10_0369 (H3K9ac)</a>        | helicase                                           | 2.1±0.1 | 1.4±0.3 | 1.3±0.1 |
| PF13_0229                                 | IRP-like protein                                   | 3.4±0.3 | 2.2±0.2 | 2.4±0.4 |
| MAL13P1.166                               | helicase                                           | 2.1±0.5 | 1.6±0.3 | 2.2±0.1 |
| <a href="#">MAL13P1.248 (GCN5/H3K9ac)</a> | nucleoside diphosphate hydrolase                   | 3.3±0.2 | 2.2±0.2 | 2.4±0.5 |
| <a href="#">PF14_0066 (GCN5)</a>          | Elp3-like                                          | 2.3±0.2 | 1.9±0.1 | 2.0±0.2 |
| <a href="#">PF14_0132 (GCN5/H3K9ac)</a>   | ribosomal protein S9                               | 2.1±0.1 | 1.7±0.2 | 1.8±0.3 |
| PF14_0207                                 | RNA polymerase subunit                             | 2.5±0.4 | 2.4±0.4 | 2.3±0.3 |
| <b>Transport</b>                          |                                                    |         |         |         |
| PFC0875w                                  | Transporter, putative                              | 2.3±0.4 | 2.2±0.3 | 2.0±0.1 |
| <a href="#">PFL1875w (H3K9ac)</a>         | Potassium ion transport                            | 2.1±0.5 | 3.3±0.4 | 2.7±0.3 |
| MAL13P1.83                                | Exportin 1-like protein                            | 2.1±0.4 | 1.6±0.2 | 2.2±0.5 |
| PF13_0019                                 | sodium/hydrogen exchanger                          | 2.5±0.2 | 2.1±0.3 | 2.2±0.2 |
| PF14_0530                                 | Ferlin like                                        | 2.3±0.4 | 2.1±0.3 | 2.4±0.4 |
| <b>Unknown</b>                            |                                                    |         |         |         |
| PFA0320w                                  | hypothetical protein                               | 2.1±0.3 | 1.8±0.4 | 1.5±0.3 |
| <a href="#">PFA0440w</a>                  | hypothetical protein                               | 2.2±0.3 | 1.7±0.4 | 2.2±0.3 |
| PFB0190c                                  | hypothetical protein                               | 2.2±0.3 |         | 2.0±0.4 |
| PFB0775w                                  | hypothetical protein                               | 2.2±0.2 | 1.3±0.5 | 1.4±0.1 |
| <a href="#">PFB0800c (GCN5/H3K9ac)</a>    | hypothetical protein                               | 4.8±0.5 | 1.6±0.3 | 1.2±0.3 |
| PFC0650w                                  | hypothetical protein                               | 2.0±0.3 | 1.6±0.2 | 1.2±0.1 |
| PFC0715c                                  | hypothetical protein                               | 2.0±0.2 | 1.4±0.1 | 1.4±0.5 |
| PFD0080c                                  | hypothetical protein                               | 2.6±0.1 | 1.4±0.1 | 1.7±0.3 |
| <a href="#">PFD0330w</a>                  | hypothetical protein                               | 2.2±0.2 | 1.7±0.3 | 1.6±0.4 |
| <a href="#">PFD0595w (H3K9ac)</a>         | hypothetical protein                               | 2.6±0.4 | 1.9±0.2 | 2.4±0.4 |
| PFD0900w                                  | hypothetical protein                               | 2.2±0.1 | 1.2±0.8 | 1.3±0.3 |
| <a href="#">PFD0945c (H3K9ac)</a>         | hypothetical protein                               | 2.3±0.2 | 1.6±0.3 | 1.9±0.4 |
| PFD1185w                                  | hypothetical protein                               | 2.9±0.3 | 2.4±0.2 | 2.1±0.1 |
| <a href="#">PFE0105c (GCN5/H3K9ac)</a>    | hypothetical protein                               | 2.2±0.3 | 1.7±0.4 | 1.4±0.5 |
| PFE0325w                                  | hypothetical protein                               | 2.4±0.1 | 1.5±0.2 | 1.8±0.1 |
| <a href="#">PFE0940c</a>                  | hypothetical protein                               | 2.4±0.3 | 2.1±0.3 | 2.2±0.3 |
| PFE1550w                                  | hypothetical protein                               | 2.1±0.1 | 1.7±0.2 | 1.7±0.4 |
| PFE1555c                                  | hypothetical protein                               | 2.5±0.4 | 2.5±0.5 | 2.5±0.3 |
| <a href="#">MAL6P1.147 (H3K9ac)</a>       | Hypothetical protein                               | 2.0±0.1 | 1.2±0.3 | 2.3±0.5 |

|                                          |                      |         |         |         |
|------------------------------------------|----------------------|---------|---------|---------|
| MAL6P1.279                               | hypothetical protein | 2.9±0.3 | 2.2±0.2 | 2.5±0.3 |
| MAL6P1.44                                | hypothetical protein | 2.1±0.2 | 2.2±0.4 | 2.4±0.5 |
| MAL7P1.118                               | Hypothetical protein | 2.2±0.3 | 1.8±0.3 | 1.7±0.4 |
| <a href="#">MAL7P1.134 (H3K9ac)</a>      | hypothetical protein | 2.1±0.4 | 1.3±0.2 | 1.4±0.3 |
| <a href="#">MAL7P1.160 (H3K9ac)</a>      | hypothetical protein | 2.1±0.2 | 1.7±0.3 | 1.6±0.2 |
| MAL7P1.83                                | hypothetical protein | 2.2±0.4 | 2.0±0.3 |         |
| MAL7P1.95                                | hypothetical protein | 2.2±0.2 | 1.6±0.4 | 1.8±0.3 |
| PF07_0024                                | hypothetical protein | 2.3±0.2 | 1.6±0.5 | 2.1±0.5 |
| <a href="#">MAL8P1.153 (GCN5/H3K9ac)</a> | hypothetical protein | 2.6±0.4 | 2.1±0.3 | 2.3±0.1 |
| MAL8P1.29                                | hypothetical protein | 2.3±0.3 | 1.4±0.2 | 1.5±0.4 |
| MAL8P1.56                                | hypothetical protein | 2.1±0.1 | 1.7±0.2 | 1.6±0.3 |
| MAL8P1.73                                | hypothetical protein | 2.3±0.3 | 1.7±0.2 | 2.2±0.2 |
| PF08_0008                                | hypothetical protein | 2.2±0.2 | 1.6±0.3 | 1.2±0.3 |
| PF08_0013                                | hypothetical protein | 2.7±0.2 | 2.3±0.1 | 2.5±0.2 |
| <a href="#">PF08_0047 (GCN5/H3K9ac)</a>  | hypothetical protein | 3.3±0.5 | 2.2±0.4 | 3.0±0.3 |
| PF08_0060                                | Asn-rich antigen     | 2.0±0.1 | 1.3±0.2 | 1.4±0.3 |
| <a href="#">PFI0210c</a>                 | hypothetical protein | 2.4±0.4 | 2.2±0.4 | 2.2±0.3 |
| PFI0410c                                 | hypothetical protein | 2.1±0.2 | 1.9±0.4 | 2.0±0.3 |
| PFI0665w                                 | hypothetical protein | 2.4±0.2 |         | 2.0±0.1 |
| <a href="#">PFI0870w (GCN5/H3K9ac)</a>   | hypothetical protein | 2.2±0.0 | 1.6±0.3 | 1.3±0.2 |
| <a href="#">PFI1445w (H3K9ac)</a>        | hypothetical protein | 2.6±0.4 | 1.8±0.5 | 2.8±0.2 |
| <a href="#">PFI1500w</a>                 | hypothetical protein | 2.1±0.5 | 1.5±0.5 | 1.5±0.1 |
| PF10_0020                                | hypothetical protein | 2.2±0.1 | 1.6±0.2 | 1.9±0.4 |
| <a href="#">PF10_0023 (H3K9ac)</a>       | hypothetical protein | 2.3±0.1 | 1.3±0.4 | 1.3±0.3 |
| <a href="#">PF10_0048 (GCN5/H3K9ac)</a>  | hypothetical protein | 2.4±0.2 | 1.9±0.3 | 1.9±0.2 |
| <a href="#">PF10_0101 (GCN5/H3K9ac)</a>  | hypothetical protein | 2.0±0.4 | 1.5±0.2 | 1.3±0.4 |
| <a href="#">PF10_0107 (H3K9ac)</a>       | hypothetical protein | 2.1±0.1 | 1.6±0.2 | 1.6±0.2 |
| PF10_0189                                | hypothetical protein | 2.1±0.4 | 1.7±0.5 | 2.1±0.4 |
| PF10_0206                                | hypothetical protein | 3.3±0.4 | 1.6±0.4 |         |
| <a href="#">PF10_0231 (GCN5/H3K9ac)</a>  | hypothetical protein | 2.2±0.5 |         |         |
| PF10_0292                                | hypothetical protein | 2.0±0.4 | 1.5±0.4 | 1.9±0.2 |
| PF10_0306                                | hypothetical protein | 2.1±0.2 | 1.5±0.2 | 1.9±0.3 |
| PF10_0320                                | hypothetical protein | 3.0±0.5 | 2.7±0.3 | 2.7±0.3 |
| <a href="#">PF10_0364 (GCN5/H3K9ac)</a>  | hypothetical protein | 2.1±0.2 | 1.6±0.1 | 1.7±0.2 |
| PF11_0063                                | hypothetical protein | 2.5±0.5 | 2.4±0.4 | 2.4±0.2 |
| PF11_0131                                | hypothetical protein | 2.1±0.3 | 1.4±0.2 | 1.5±0.1 |
| <a href="#">PF11_0135</a>                | hypothetical protein | 2.1±0.4 | 1.5±0.5 | 1.8±0.1 |
| PF11_0143                                | hypothetical protein | 2.9±0.2 | 2.1±0.1 | 2.6±0.4 |
| <a href="#">PF11_0146 (GCN5/H3K9ac)</a>  | hypothetical protein | 2.2±0.1 | 1.5±0.1 | 1.6±0.5 |
| <a href="#">PF11_0163</a>                | hypothetical protein | 2.1±0.1 | 1.7±0.1 | 1.6±0.2 |
| PF11_0178                                | hypothetical protein | 2.1±0.3 | 1.5±0.3 | 1.7±0.5 |
| <a href="#">PF11_0186 (GCN5/H3K9ac)</a>  | hypothetical protein | 2.4±0.3 | 1.7±0.4 | 1.9±0.4 |
| <a href="#">PF11_0193 (GCN5/H3K9ac)</a>  | hypothetical protein | 2.3±0.2 | 1.8±0.2 | 2.1±0.3 |
| PF11_0243                                | hypothetical protein | 2.2±0.3 | 1.7±0.2 | 2.1±0.4 |
| <a href="#">PF11_0261</a>                | hypothetical protein | 2.1±0.2 | 1.7±0.3 | 2.4±0.2 |
| <a href="#">PF11_0262</a>                | hypothetical protein | 2.6±0.4 | 2.2±0.3 | 2.2±0.3 |
| PF11_0300                                | hypothetical protein | 2.2±0.3 | 1.7±0.1 | 2.0±0.3 |

|                           |                      |         |         |         |
|---------------------------|----------------------|---------|---------|---------|
| PF11_0419                 | hypothetical protein | 2.4±0.1 | 1.7±0.0 | 2.0±0.3 |
| PF11_0451                 | hypothetical protein | 2.6±0.2 | 2.2±0.1 | 2.1±0.1 |
| PF11_0472 (H3K9ac)        | hypothetical protein | 3.0±0.4 | 2.8±0.4 | 2.7±0.3 |
| PF11_0476 (GCN5/H3K9ac)   | hypothetical protein | 2.2±0.1 | 1.5±0.4 | 1.4±0.2 |
| PF11_0481                 | hypothetical protein | 2.3±0.2 | 2.5±0.2 | 2.9±0.0 |
| PF11_0528                 | hypothetical protein | 2.0±0.5 |         | 2.0±0.3 |
| PFL0250w                  | hypothetical protein | 2.4±0.2 | 1.9±0.1 | 1.8±0.1 |
| PFL0370w                  | hypothetical protein | 2.9±0.2 | 1.1±0.5 | 0.2±0.2 |
| PFL0875w                  | hypothetical protein | 2.1±0.1 |         | 1.3±0.5 |
| PFL1025c                  | hypothetical protein | 2.2±0.1 | 1.8±0.2 | 2.0±0.3 |
| PFL1115w                  | hypothetical protein | 2.7±0.2 | 2.1±0.1 | 2.2±0.4 |
| PFL1300c                  | hypothetical protein | 2.5±0.2 |         |         |
| PFL1390w                  | hypothetical protein | 2.4±0.1 | 1.7±0.1 | 1.7±0.2 |
| PFL1405w                  | hypothetical protein | 2.4±0.4 | 2.3±0.5 | 2.2±0.2 |
| PFL1580w (GCN5)           | hypothetical protein | 2.2±0.3 | 2.0±0.3 | 2±0.4   |
| PFL2015w (GCN5/H3K9ac)    | Hypothetical protein | 2.3±0.1 | 1.9±0.2 | 1.7±0.4 |
| PFL2530w                  | hypothetical protein | 2.2±0.4 | 1.7±0.3 | 1.3±0.5 |
| MAL13P1.103 (GCN5/H3K9ac) | hypothetical protein | 2.1±0.3 | 1.2±0.2 | 1.3±0.3 |
| MAL13P1.114               | hypothetical protein | 2.1±0.2 | 1.6±0.1 | 2.2±0.5 |
| MAL13P1.131 (GCN5/H3K9ac) | hypothetical protein | 2.1±0.1 | 1.4±0.1 | 1.1±0.2 |
| MAL13P1.157               | hypothetical protein | 2.5±0.5 | 2.5±0.4 | 2.1±0.3 |
| MAL13P1.195 (GCN5/)       | hypothetical protein | 2.6±0.4 | 2.6±0.3 | 2.4±0.2 |
| MAL13P1.212               | hypothetical protein | 2.1±0.5 | 1.5±0.3 | 1.6±0.1 |
| MAL13P1.226               | hypothetical protein | 2.3±0.5 | 1.9±0.4 | 1.3±0.4 |
| MAL13P1.247               | hypothetical protein | 2.6±0.3 | 2.7±0.3 | 2.6±0.2 |
| MAL13P1.293               | hypothetical protein | 2.1±0.4 | 2.1±0.4 | 2.0±0.3 |
| MAL13P1.325               | hypothetical protein | 2.3±0.4 | 2.1±0.3 | 1.9±0.2 |
| MAL13P1.78                | hypothetical protein | 2.1±0.4 |         | 2.0±0.3 |
| PF13_0135                 | hypothetical protein | 2.2±0.1 | 1.6±0.2 | 1.3±0.2 |
| PF13_0173                 | hypothetical protein | 2.3±0.4 | 1.8±0.2 | 2.2±0.5 |
| PF13_0255                 | hypothetical protein | 2.0±0.3 | 1.7±0.1 | 2.3±0.2 |
| PF13_0311                 | hypothetical protein | 2.7±0.4 | 2.5±0.2 | 2.4±0.3 |
| PF14_0095 (GCN5/H3K9ac)   | hypothetical protein | 2.1±0.3 | 1.8±0.5 | 1.7±0.4 |
| PF14_0217                 | hypothetical protein | 2.0±0.3 | 1.7±0.2 | 1.7±0.2 |
| PF14_0291                 | hypothetical protein | 2.2±0.3 | 1.3±0.8 | 1.4±0.2 |
| PF14_0325                 | hypothetical protein | 2.1±0.2 | 1.5±0.4 | 1.9±0.3 |
| PF14_0404                 | hypothetical protein | 3.0±0.2 | 2.8±0.4 | 3.0±0.4 |
| PF14_0468                 | Hypothetical protein | 2.1±0.5 | 2.0±0.4 | 2.0±0.3 |
| PF14_0495                 | hypothetical protein | 2.1±0.4 | 2.0±0.5 | 2.4±0.3 |
| PF14_0498 (H3K9ac)        | hypothetical protein | 2.2±0.4 | 1.5±0.5 |         |
| PF14_0506                 | hypothetical protein | 2.1±0.4 | 1.5±0.5 | 1.8±0.3 |
| PF14_0657                 | hypothetical protein | 2.1±0.1 | 1.6±0.1 | 1.6±0.4 |
| PF14_0701                 | hypothetical protein | 4.0±0.0 | 2.1±0.5 | 2.6±0.5 |
| PF14_0712 (H3K9ac)        | hypothetical protein | 3.0±0.4 | 1.6±0.1 | 1.7±0.5 |
| PF14_0714                 | hypothetical protein | 2.0±0.2 | 1.3±0.2 | 1.1±0.2 |
| PF14_0757 (H3K9ac)        | hypothetical protein | 2.4±0.3 | 1.5±0.3 | 1.7±0.0 |

\*Genes with the microarray oligoes within 500 bp from the putative ATG codon are in blue. Those genes enriched with H3K9ac or PfGCN5 from the ChIP-chip analysis are also indicated.

## Up-regulated genes

| <b>Binding</b>                   |                                          |         |         |         |
|----------------------------------|------------------------------------------|---------|---------|---------|
| PFD0640c                         | rifin                                    | 2.2±0.1 | 2.3±0.2 | 2.4±0.2 |
| PF10_0019                        | early transcribed membrane protein       | 2.7±0.1 | 2.4±0.1 | 1.8±0.4 |
| PF10_0395                        | stevor                                   | 2.2±0.5 | 2.8±0.4 | 2.8±0.3 |
| PF14_0532                        | LCCL domain-containing (G)               | 2.1±0.4 | 1.9±0.4 | 2.2±0.5 |
| PF10_0016                        | acyl CoA binding protein                 | 2.5±0.3 | 2.0±0.1 | 1.9±0.2 |
| <b>Catalytic/Metabolic</b>       |                                          |         |         |         |
| PFB0880w                         | Saccharop-dh domain-containing (G)       | 2.1±0.4 | 1.7±0.4 | 1.9±0.1 |
| PFE0630c                         | orotate phosphoribosyltransferase        | 2.0±0.2 | 1.9±0.0 | 1.8±0.3 |
| PFE0660c                         | uridine phosphorylase                    | 2.1±0.1 | 1.8±0.4 | 1.9±0.2 |
| PFE1035c                         | BIS(5'-nucleosyl)-tetraphosphatase       | 2.0±0.1 | 1.9±0.5 | 2.0±0.1 |
| PF08_0131                        | 1-cys peroxidoxin                        | 2.0±0.1 | 1.9±0.2 | 1.6±0.4 |
| PF10_0121                        | hypoxanthine phosphoribosyltransferase   | 3.7±0.4 | 2.6±0.2 | 2.7±0.3 |
| PFL0285w                         | glyoxalase II family protein             | 2.3±0.1 | 2.9±0.1 | 2.4±0.2 |
| PF13_0269                        | glycerol kinase (G)                      | 2.3±0.2 |         | 2.3±0.4 |
| PF14_0341                        | glucose-6-phosphate isomerase            | 2.1±0.5 | 2.2±0.1 | 2.0±0.5 |
| PF14_0399                        | ADP-ribosylation-like factor             | 2.0±0.3 | 1.8±0.4 | 1.8±0.0 |
| PF14_0598                        | glyceraldehyde-3-phosphate dehydrogenase | 2.2±0.5 | 2.1±0.5 | 1.9±0.4 |
| <b>Chaperone</b>                 |                                          |         |         |         |
| PFA0460c                         | tubulin-specific chaperone a             | 2.2±0.1 | 1.9±0.3 | 1.9±0.3 |
| PFC0975c                         | cyclophilin                              | 2.3±0.2 | 1.8±0.2 | 1.8±0.1 |
| PF08_0054                        | heat shock 70 kDa protein                | 2.2±0.2 | 2.5±0.1 | 2.0±0.1 |
| PFL0740c                         | 10 kd chaperonin                         | 2.1±0.4 | 1.9±0.1 | 2.1±0.1 |
| <b>DNA replication/repair</b>    |                                          |         |         |         |
| PF11_0071                        | RuvB DNA helicase                        | 2.2±0.4 | 1.2±0.4 | 1.1±0.1 |
| PF14_0081                        | DNA repair helicase                      | 1.9±0.2 | 2.3±0.3 | 2.1±0.1 |
| <b>Gametocytes specific</b>      |                                          |         |         |         |
| PFD0310w                         | Pfs16 (G)                                | 2.3±0.3 | 1.9±0.2 | 1.9±0.2 |
| PF13_0011                        | Pfs27/25 (G)                             | 2.4±0.1 | 2.2±0.4 | 2.1±0.3 |
| <b>Motor activity</b>            |                                          |         |         |         |
| PFI0260c                         | Dynein heavy chain                       | 2.1±0.3 | 1.9±0.1 | 1.9±0.1 |
| <b>Signal transduction</b>       |                                          |         |         |         |
| MAL6P1.191                       | protein kinase                           | 2.0±0.3 | 1.7±0.2 | 1.9±0.2 |
| MAL13P1.84                       | protein kinase (G)                       | 2.0±0.2 | 1.8±0.2 | 1.7±0.5 |
| <b>Structural</b>                |                                          |         |         |         |
| PF11_0062                        | histone H2B                              | 2.2±0.5 | 2.0±0.3 | 1.6±0.1 |
| <b>Translation/transcription</b> |                                          |         |         |         |

|             |                                    |         |         |         |
|-------------|------------------------------------|---------|---------|---------|
| PFC0400w    | 60S acidic ribosomal protein P2    | 2.0±0.3 | 1.7±0.1 | 1.7±0.4 |
| MAL7P1.151  | DNA methylase                      | 2.4±0.3 | 2.5±0.4 | 2.1±0.3 |
| PF08_0037   | MED7 protein homologue             | 2.2±0.2 | 2.0±0.1 | 2.4±0.2 |
| PF11_0260   | ribosomal protein L35              | 2.0±0.3 | 1.9±0.5 | 1.8±0.5 |
| PFL2475w    | DEAD/DEAH box helicase             | 2.0±0.2 | 2.3±0.3 | 1.6±0.1 |
| MAL13P1.209 | 60S ribosomal subunit porotein L18 | 2.1±0.0 | 2.0±0.2 | 1.6±0.1 |
| PF14_0141   | ribosomal protein L10              | 2.1±0.4 | 2.0±0.4 | 1.9±0.5 |
| PF14_0448   | ribosomal protein S2               | 2.1±0.2 | 2.1±0.3 | 1.8±0.3 |

### Transport

|           |                                                 |         |         |         |
|-----------|-------------------------------------------------|---------|---------|---------|
| PF13_0358 | mitochondrial import inner membrane translocase | 2.1±0.5 | 1.8±0.5 | 1.8±0.4 |
| PF13_0252 | nucleoside transporter 1                        | 2.0±0.4 | 1.9±0.5 | 2.1±0.5 |

### Unknown

|             |                          |         |         |         |
|-------------|--------------------------|---------|---------|---------|
| PFA0490w    | hypothetical protein (G) | 2.2±0.5 | 2.0±0.3 | 2.0±0.1 |
| PFB0985c    | hypothetical protein     | 2.5±0.0 | 2.2±0.1 | 2.0±0.4 |
| PFD0440w    | hypothetical protein     | 2.6±0.3 | 3.6±0.3 | 3.1±0.3 |
| PFD0820w    | hypothetical protein     | 2.1±0.2 | 2.0±0.5 | 2.2±0.3 |
| PFE0060w    | hypothetical protein     | 2.2±0.2 | 2.3±0.4 | 2.2±0.3 |
| PFE0680w    | hypothetical protein (G) | 2.2±0.4 | 2.5±0.1 | 2.5±0.1 |
| PFE0685w    | hypothetical protein (G) | 2.8±0.4 | 2.8±0.1 | 2.8±0.1 |
| PFE0875c    | hypothetical protein (G) | 5.3±0.4 | 6.1±0.4 | 1.8±0.1 |
| PFE1395c    | hypothetical protein     | 2.4±0.2 | 1.6±0.5 | 1.2±0.5 |
| MAL6P1.15   | hypothetical protein     | 2.3±0.1 | 2.5±0.4 | 2.0±0.1 |
| MAL6P1.214  | hypothetical protein     | 2.1±0.2 | 1.9±0.1 | 1.9±0.2 |
| PF07_0094   | hypothetical protein (G) | 2.2±0.0 | 2.1±0.1 | 2.2±0.1 |
| MAL8P1.49   | hypothetical protein     | 2.3±0.5 | 2.0±0.4 | 2.2±0.2 |
| PFI1405c    | hypothetical protein     | 2.3±0.2 |         | 2.1±0.2 |
| PFI1785w    | hypothetical protein     | 2.5±0.2 | 1.8±0.3 | 1.3±0.2 |
| PF10_0164   | hypothetical protein     | 2.6±0.2 | 2.1±0.2 | 2.0±0.3 |
| PF11_0014   | hypothetical protein     | 2.4±0.3 | 2.3±0.1 | 2.5±0.5 |
| PF14_0290   | hypothetical protein (G) | 2.7±0.3 | 2.1±0.3 | 2.4±0.1 |
| PFL0715w    | hypothetical protein     | 2.7±0.1 | 2.3±0.1 | 2.6±0.4 |
| PFL0795c    | hypothetical protein (G) | 2.9±0.3 | 2.3±0.1 | 2.8±0.2 |
| PFL1585c    | hypothetical protein     | 3.0±0.2 | 2.8±0.3 | 2.1±0.3 |
| MAL13P1.340 | hypothetical protein (G) | 2.1±0.4 |         |         |
| MAL13P1.350 | hypothetical protein (G) | 2.4±0.4 | 2.2±0.2 |         |
| PF13_0075   | hypothetical protein     | 2.1±0.4 | 1.8±0.1 | 1.4±0.5 |
| PF13_0076   | hypothetical protein     | 2.0±0.1 | 1.8±0.2 | 1.8±0.3 |
| PF14_0744   | hypothetical protein     | 2.2±0.1 | 2.1±0.1 | 2.0±0.2 |

(G): Gametocyte-specific genes according to published data (Young et al. 2005. The *Plasmodium falciparum* sexual development transcriptome: a microarray analysis using ontology-based pattern identification. Mol Biochem Parasitol. 143:67-79.)



**Supplemental Fig.1.** Cluster analysis of genes with  $\geq 2$ -fold down- or up-regulation after 12 h of 20  $\mu\text{M}$  of AA treatment. Based on their expression profiles, the genes were roughly divided into seven groups. Two vertical arrows and lines are used to illustrate the expression status of the genes at the time of addition of AA (18 h) and of microarray analysis (30 h).

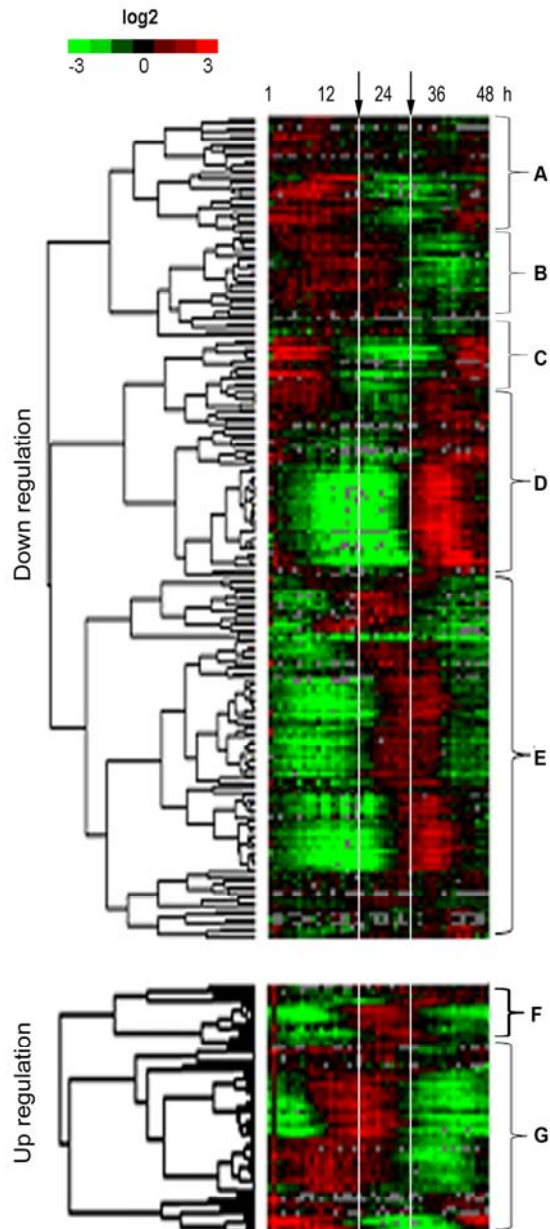

Supplement: EC.00063-08_1.pdf [file EC.00063-08_1.pdf]
